# Supplementary material for: Open access versus subscription journals: a comparison of scientific impact
Source: Springer Nature journal article supplement (doi:10.1186/1741-7015-10-73), 2012-07-17

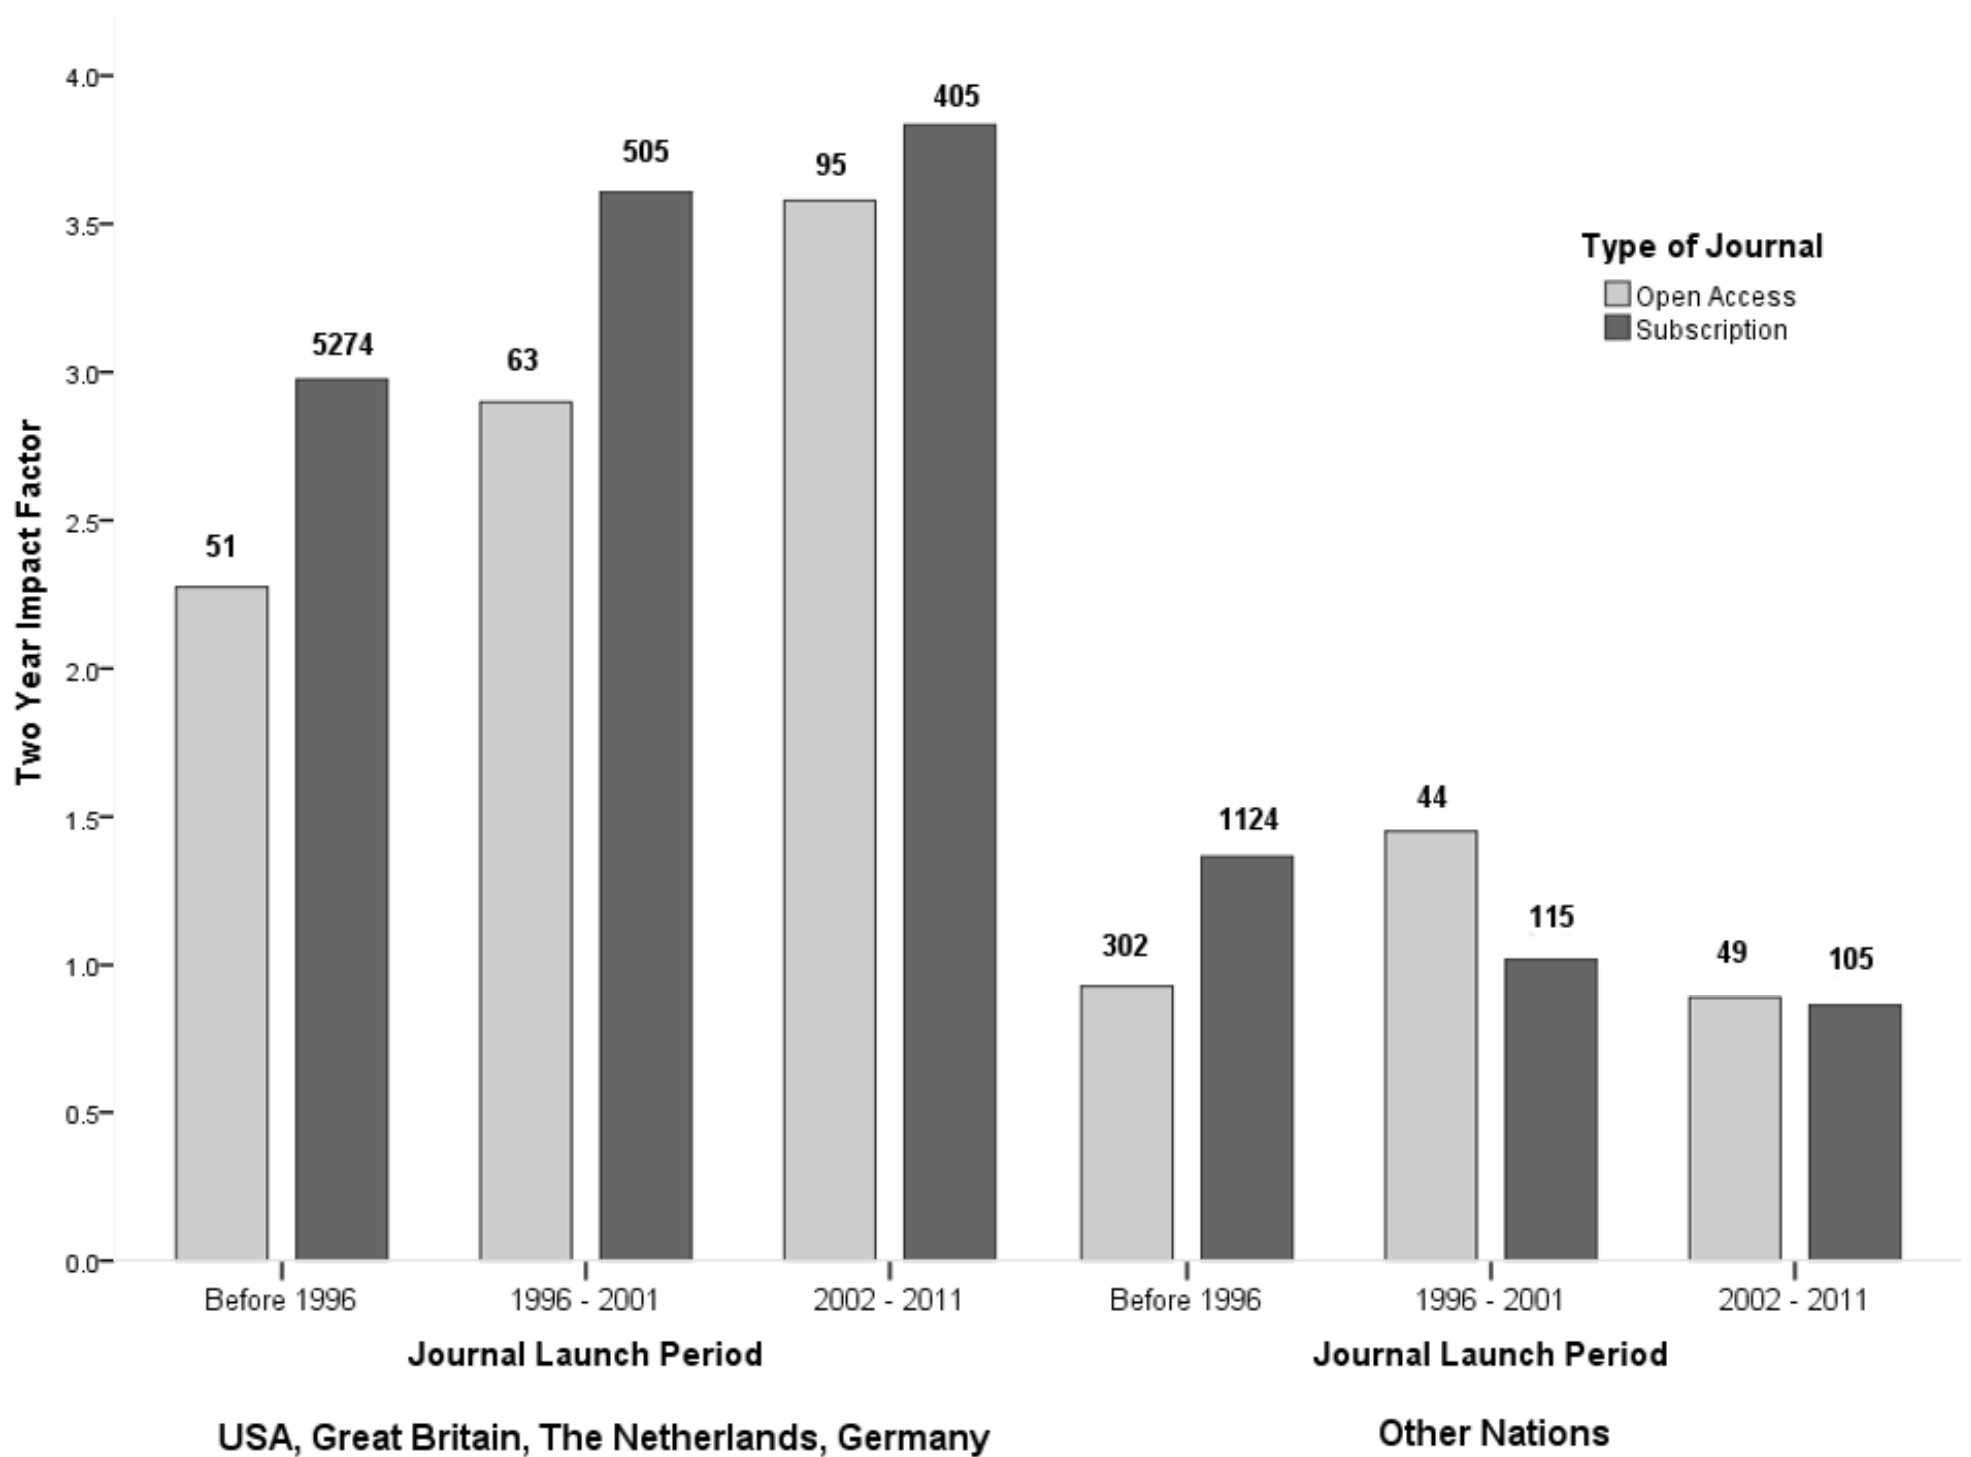

Supplement: 12916_2012_556_MOESM1_ESM.pdf [file 12916_2012_556_MOESM1_ESM.pdf]
